# Supplementary material
Source: HighWire-hosted journal article supplement (http://www.ajnr.org/highwire/filestream/52039/field_highwire_adjunct_files/1/Figure_6.pdf)

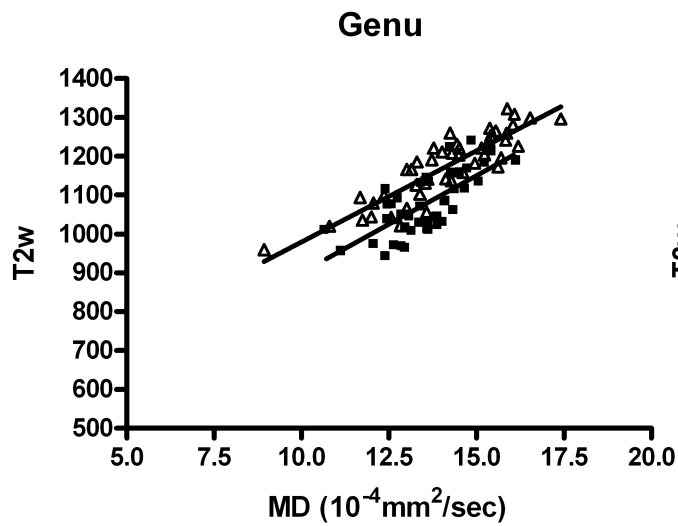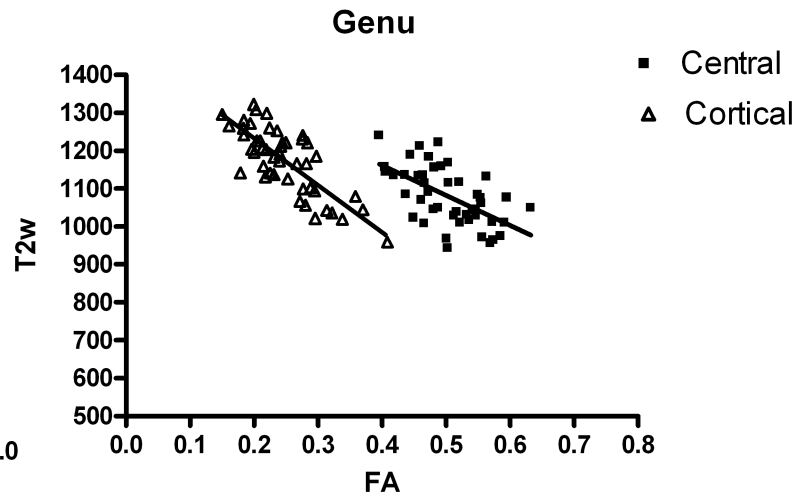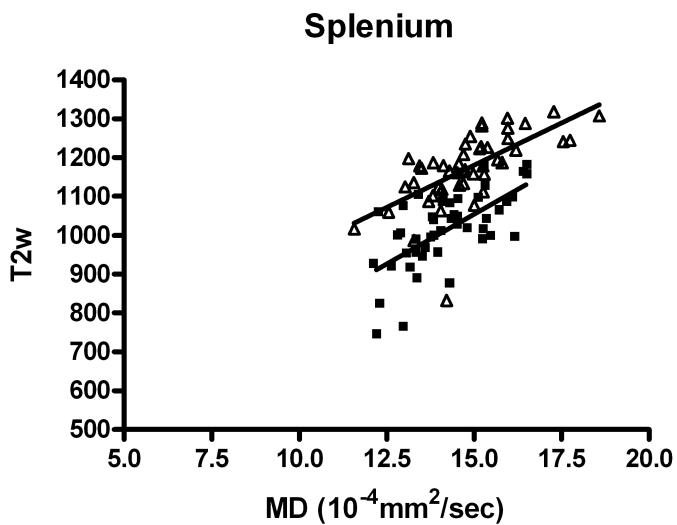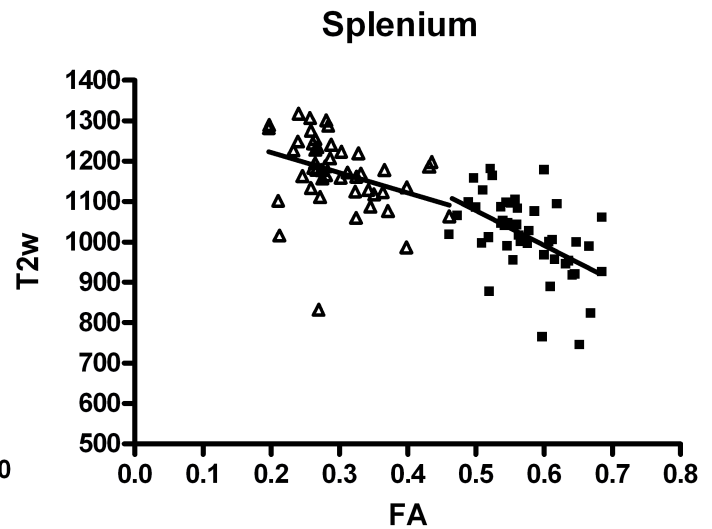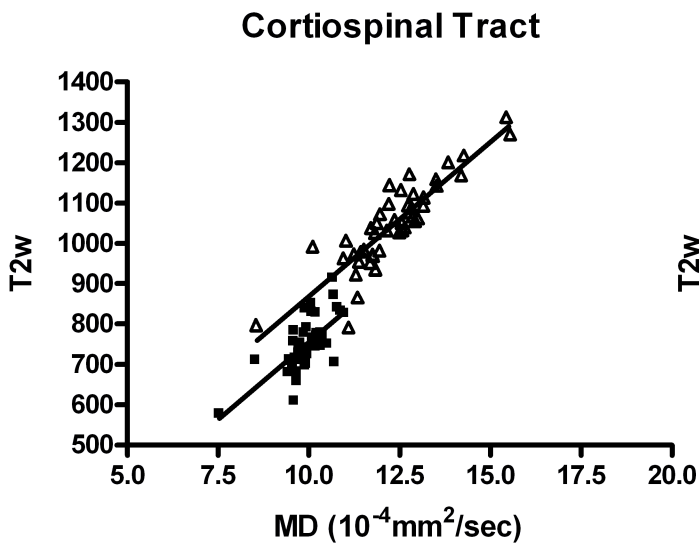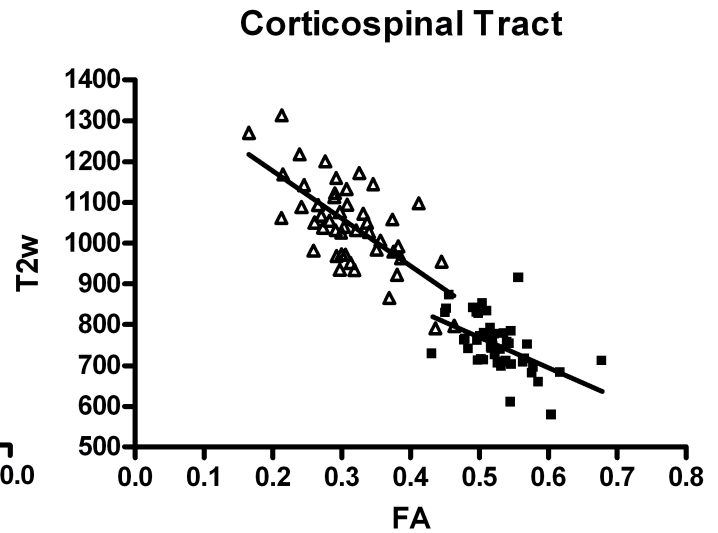

Supplement: Figure_6.pdf [file Figure_6.pdf]
